# Supplementary material for: One-pot synthesis of 6H-benzo[b]benzo[4,5]imidazo[1,2-d][1,4]oxazines via a copper-catalyzed process
Source: Royal Society of Chemistry journal article supplement (doi:10.1039/c3ra42108b), 2013-01-01

## Supporting Information

One-pot synthesis of 6*H*-benzo[*b*]benzo[4,5]imidazo[1,2-*d*][1,4]oxazines  
via copper-catalyzed process

Aiping Huang, Huanhuan Liu, Chen Ma\*

*School of Chemistry and Chemical Engineering, Shandong University, Jinan, 250100,  
P R China.*

### Contents

|                                |         |
|--------------------------------|---------|
| 1. NMR Spectra of <b>3a-3l</b> | S2-S13  |
| 2. NMR Spectra of <b>4a-4f</b> | S14-S19 |

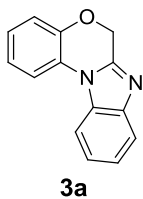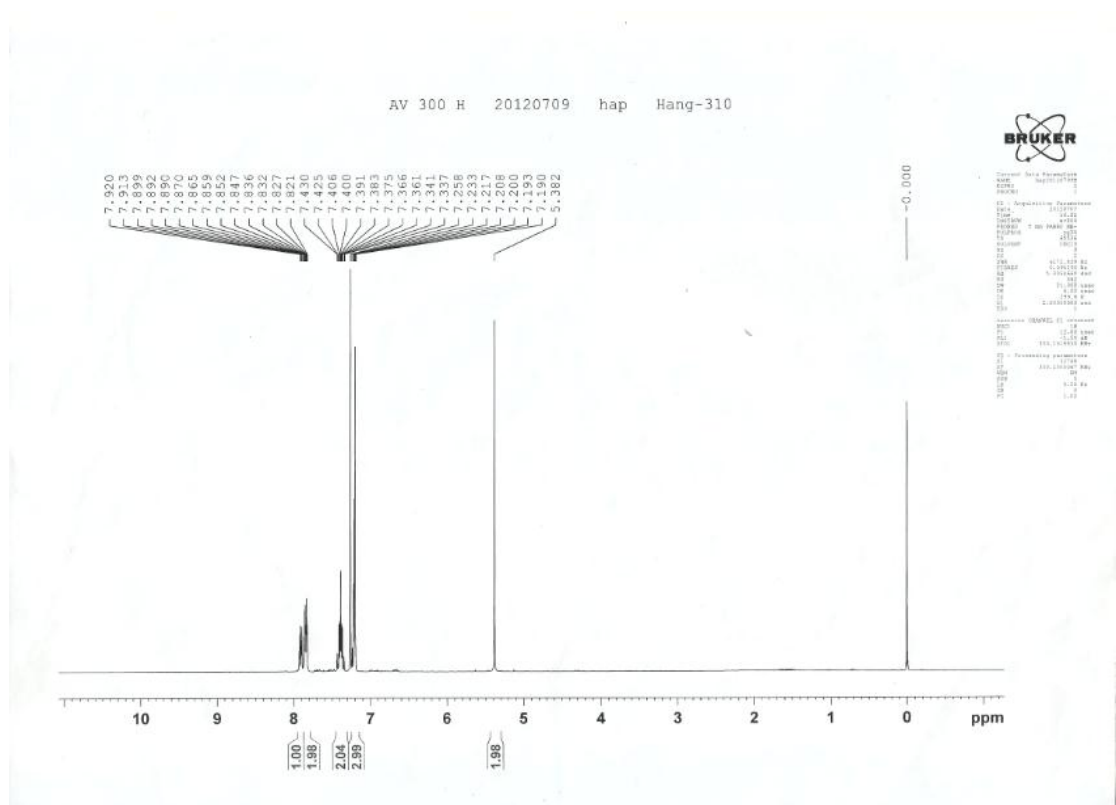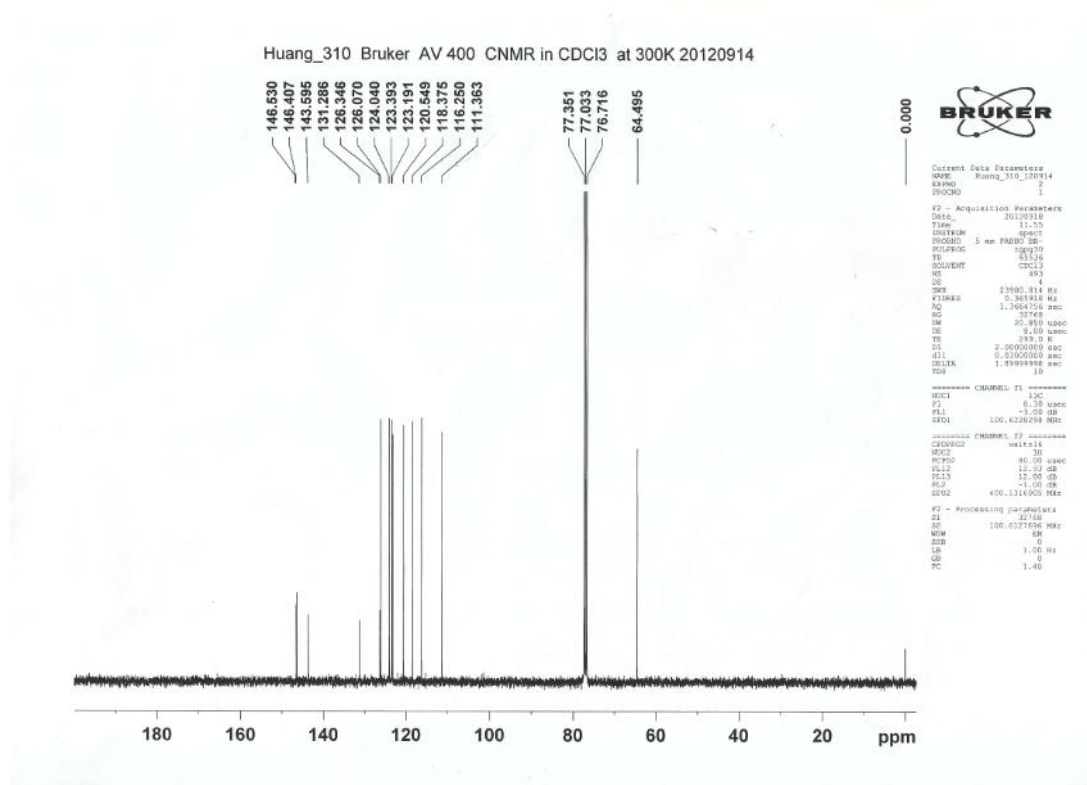

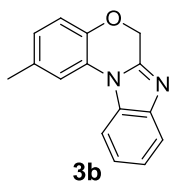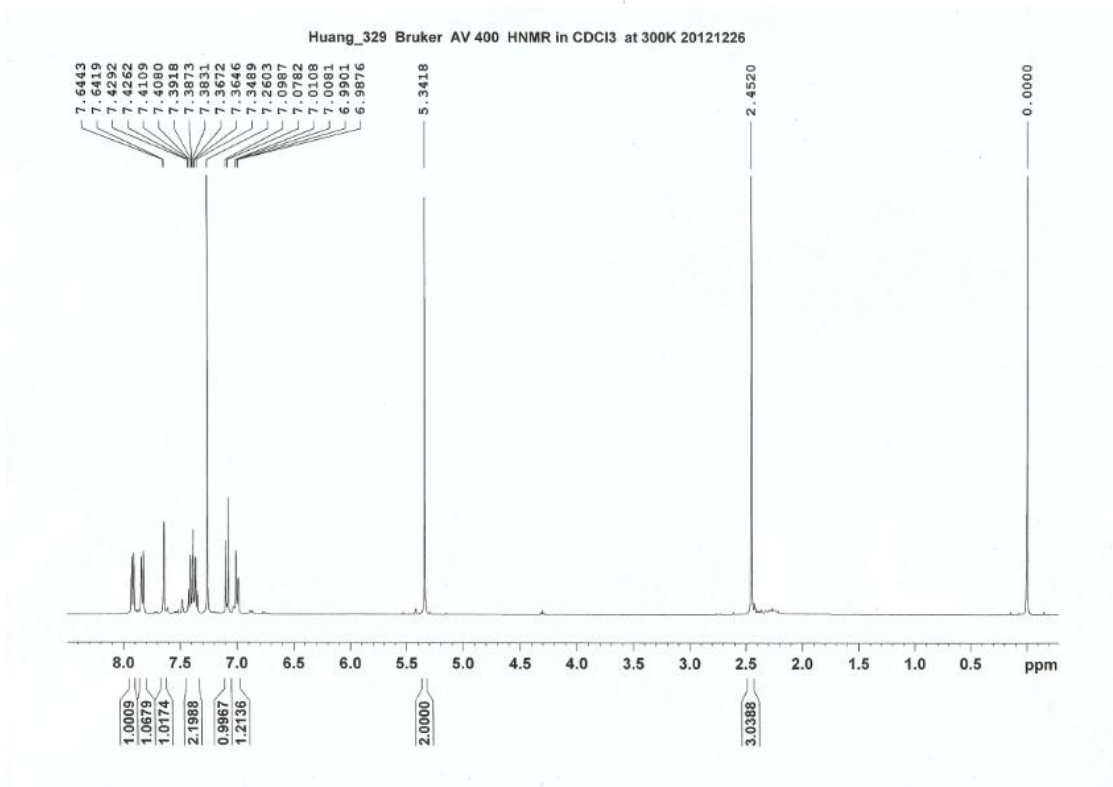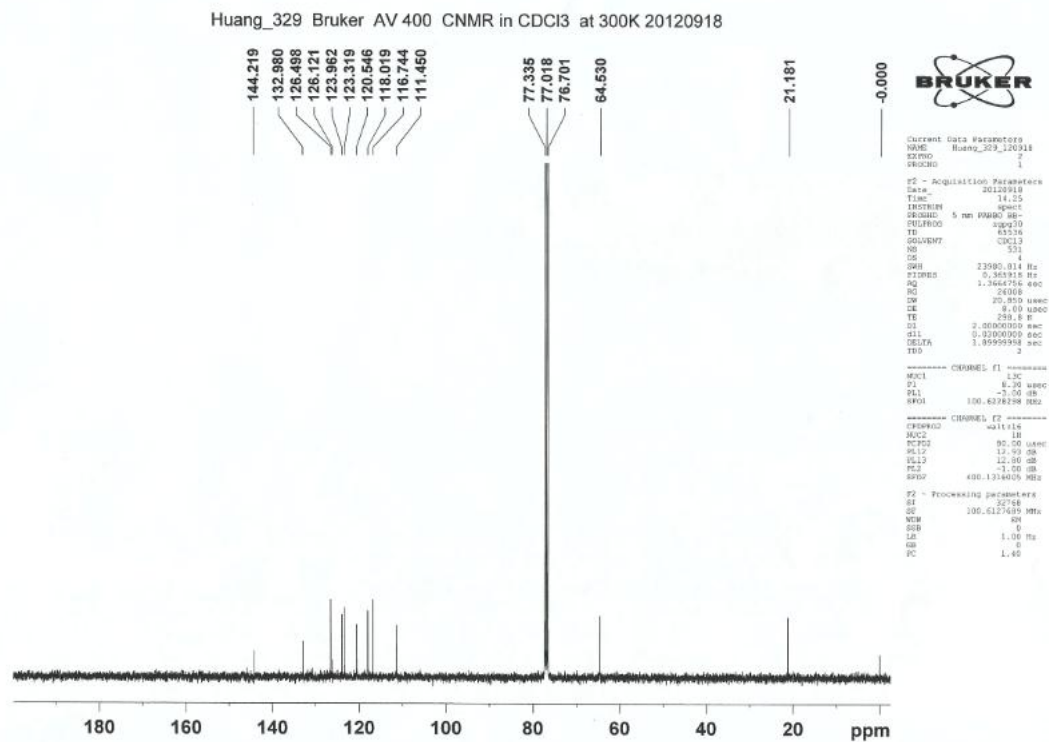



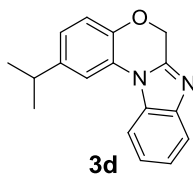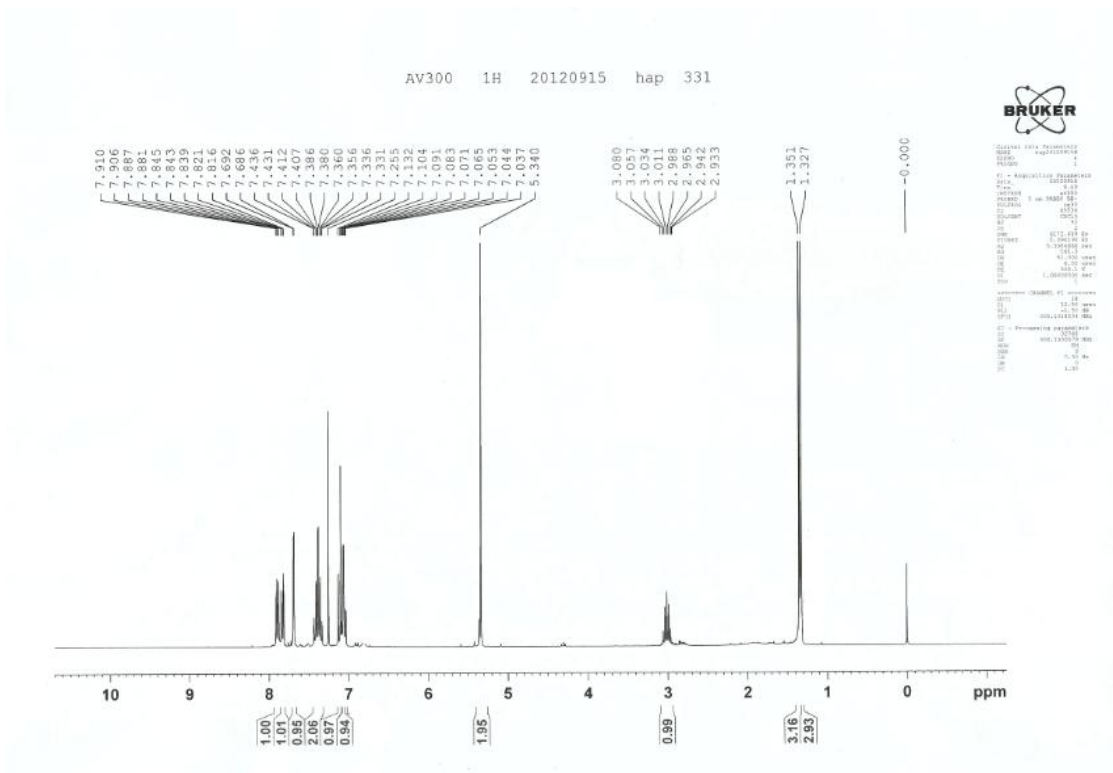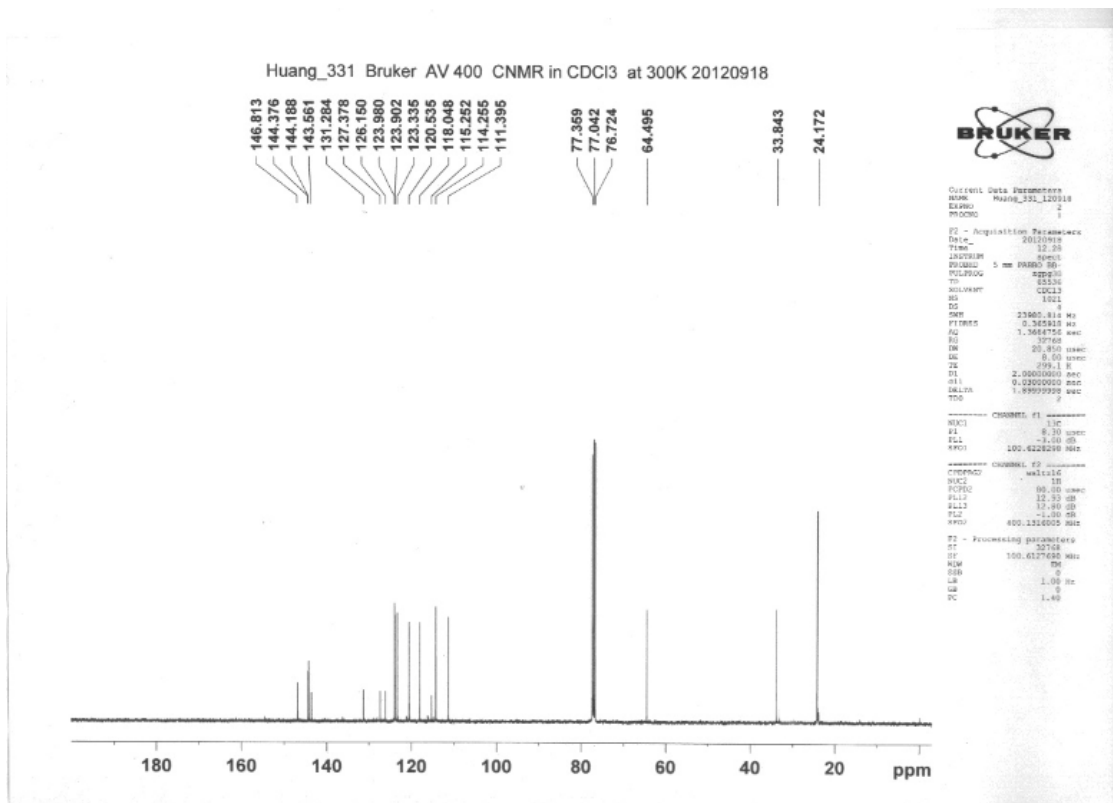

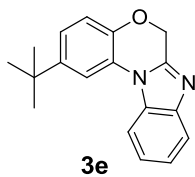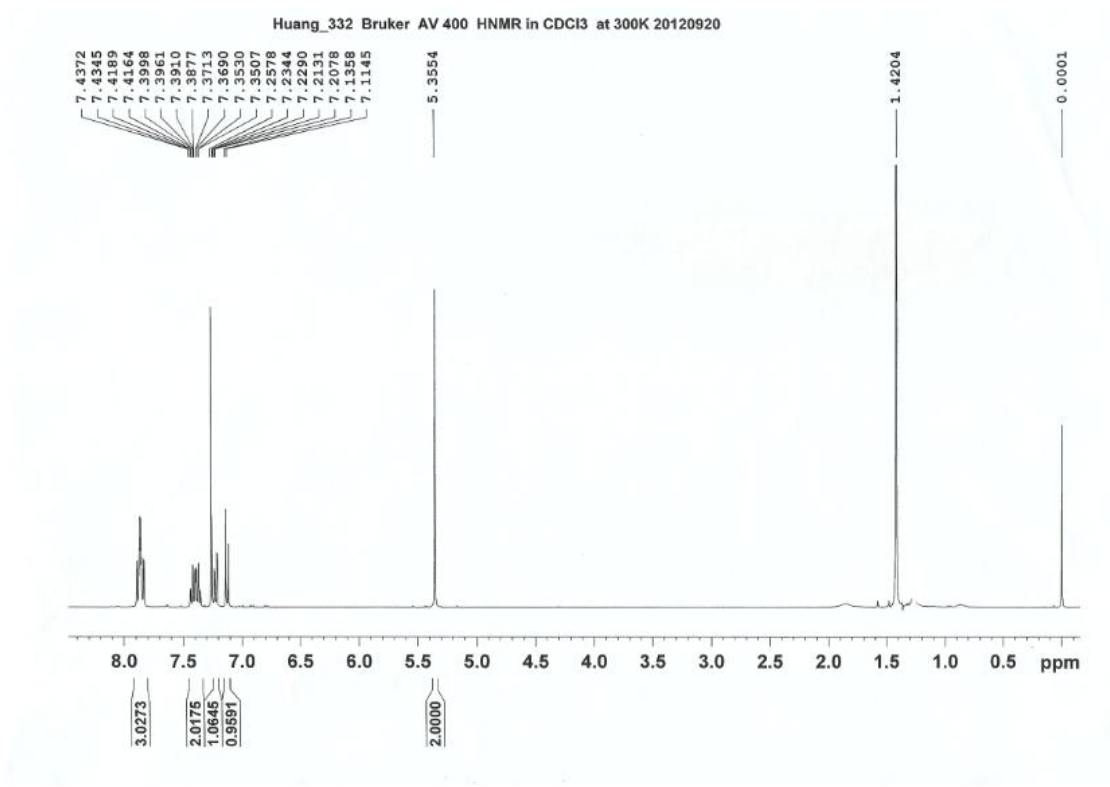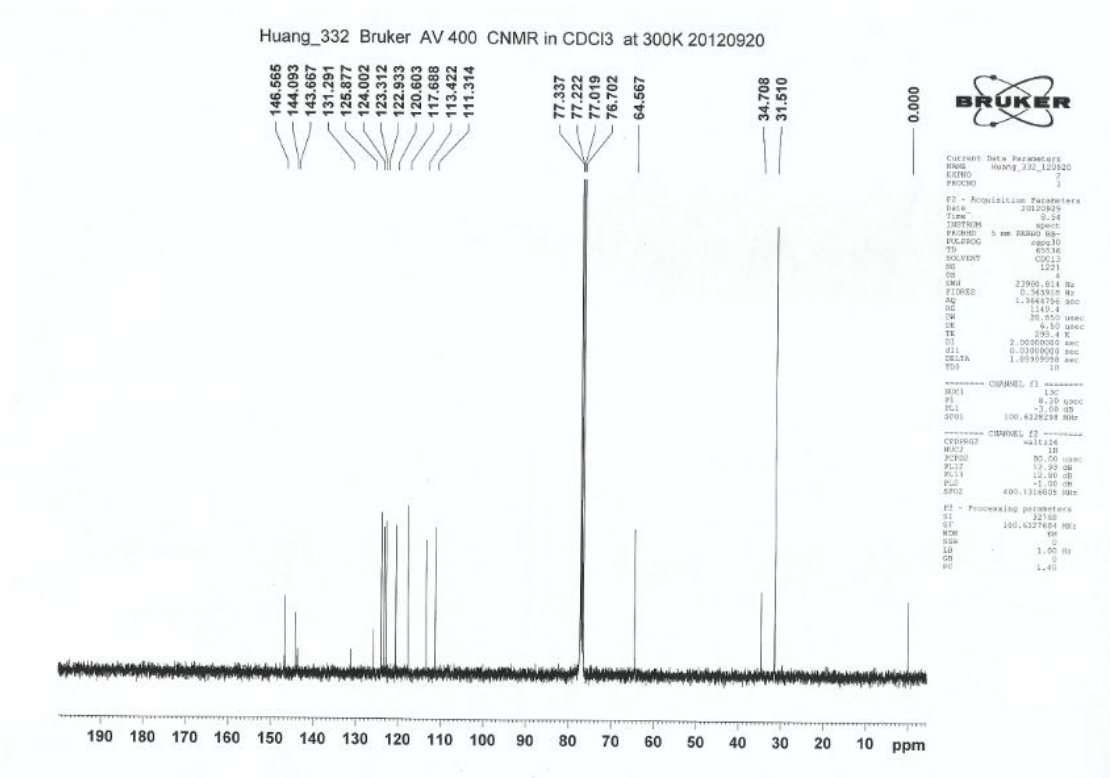

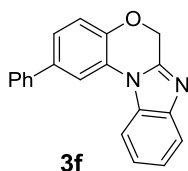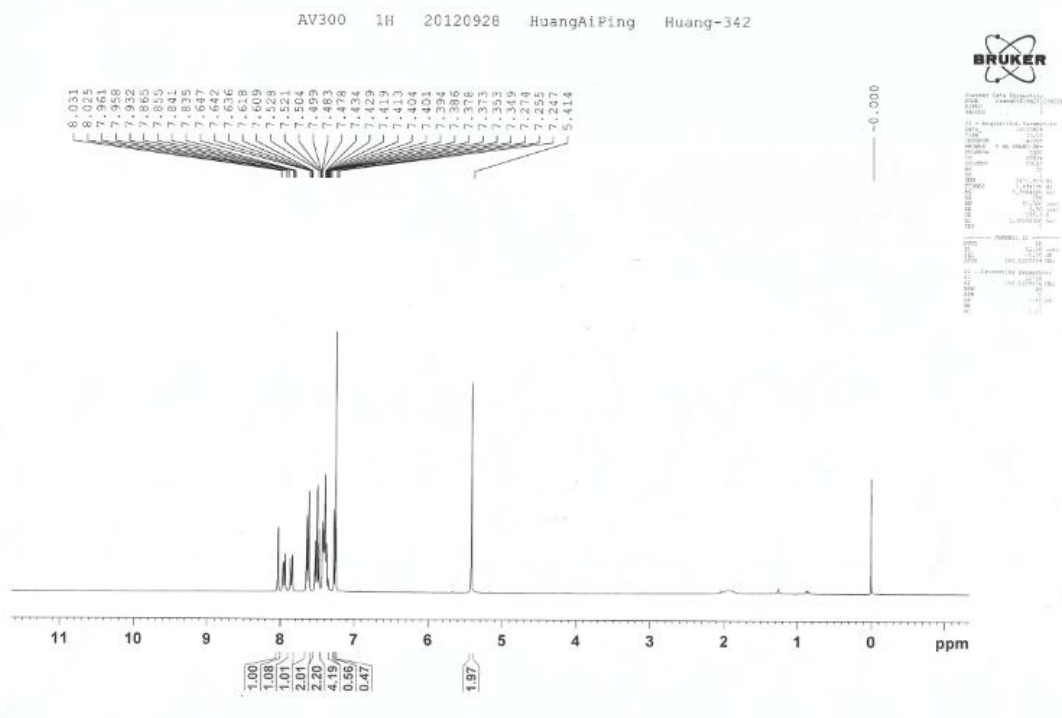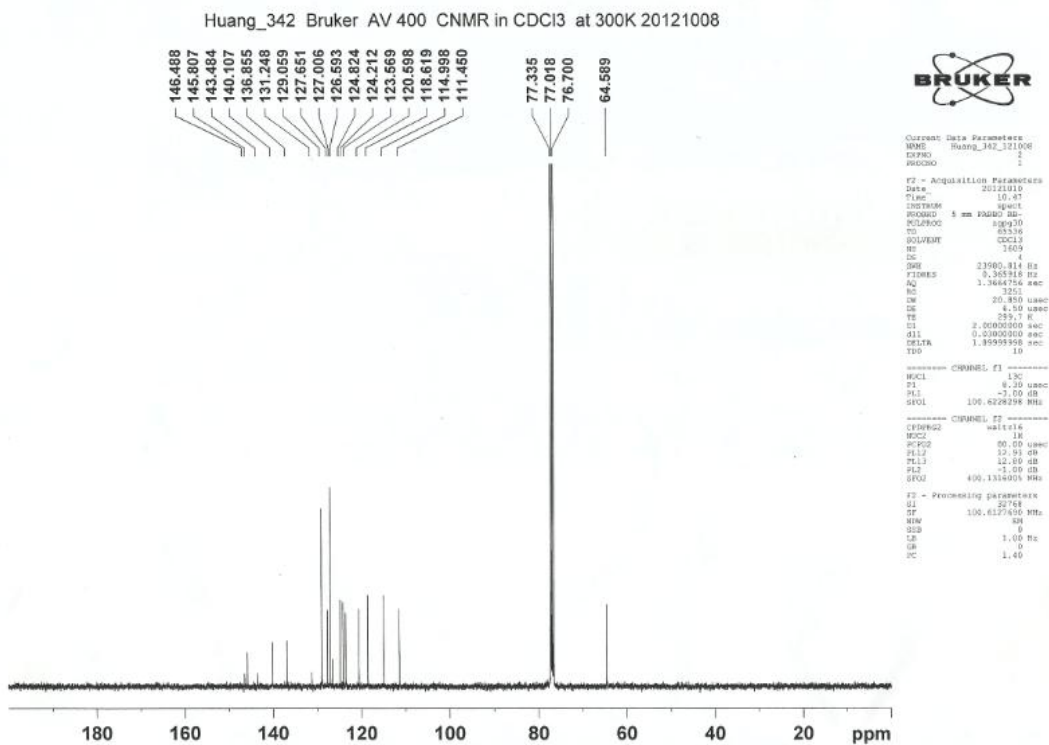





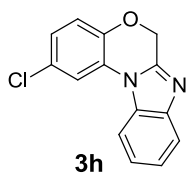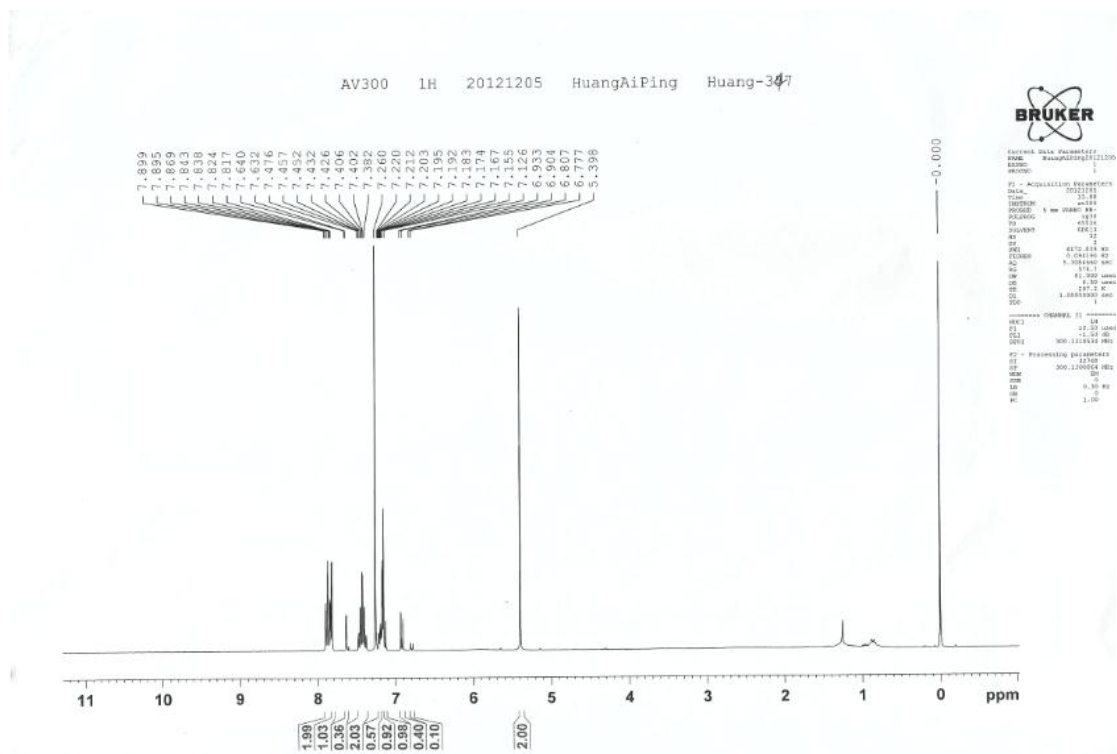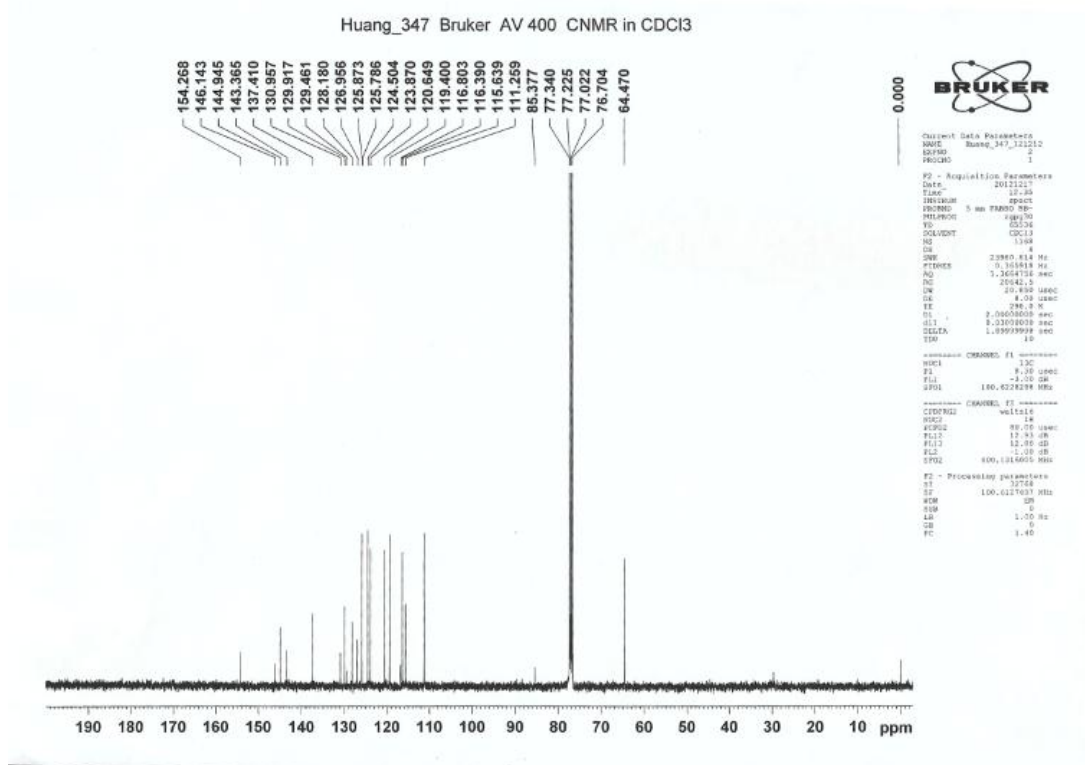



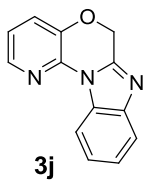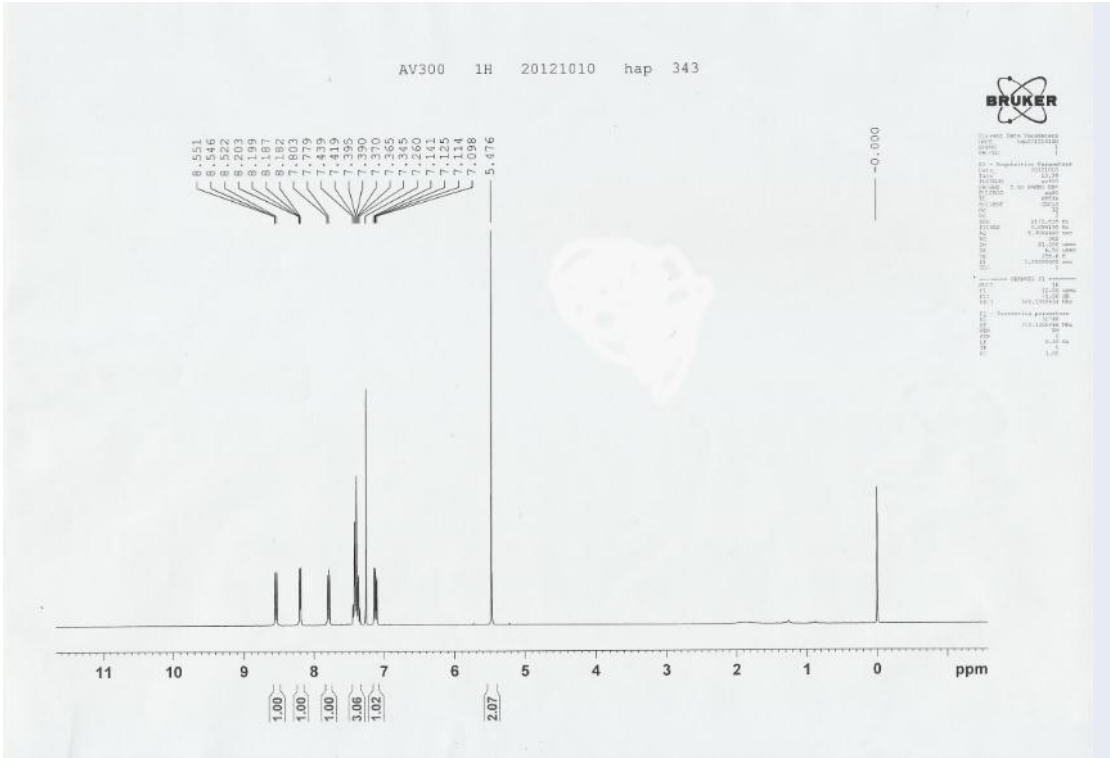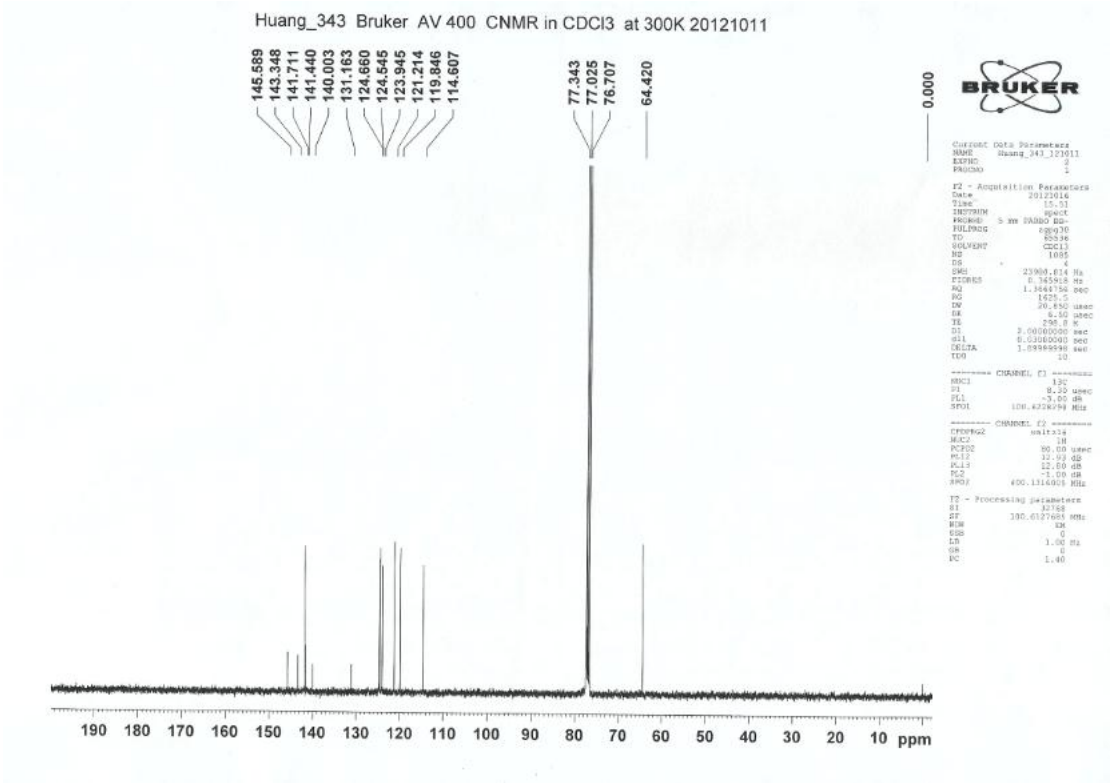

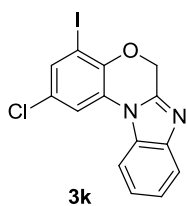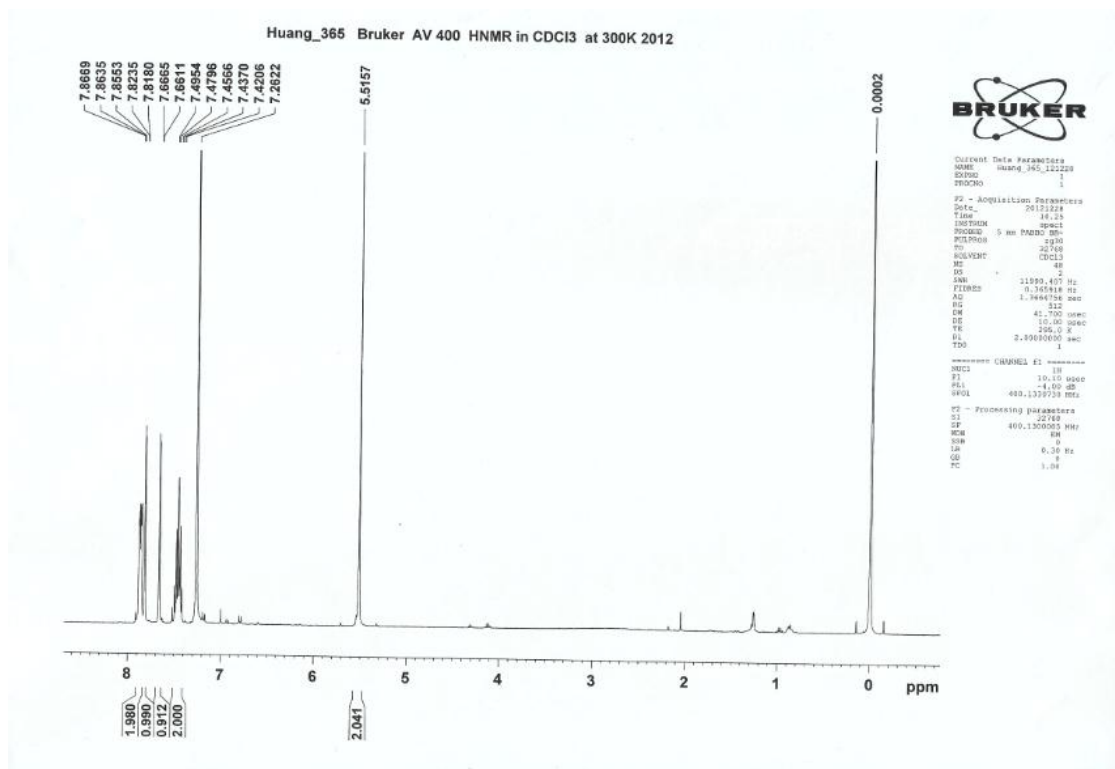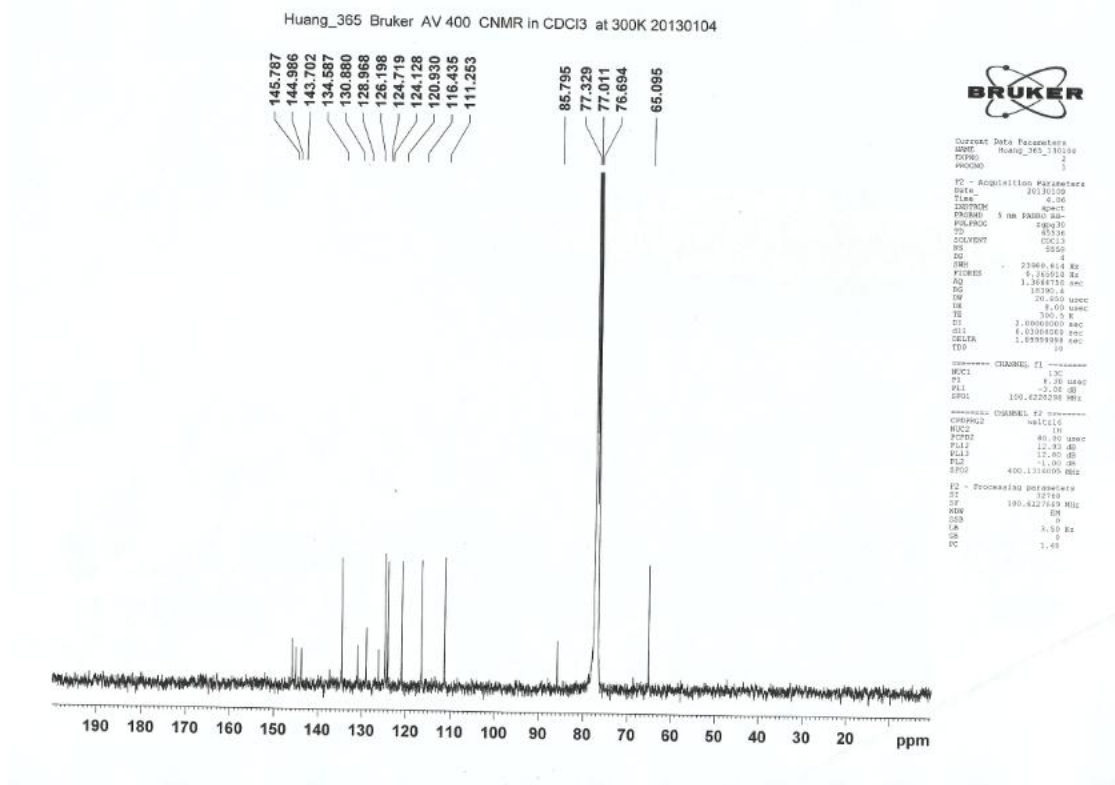

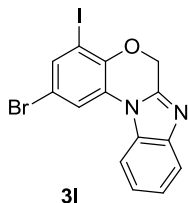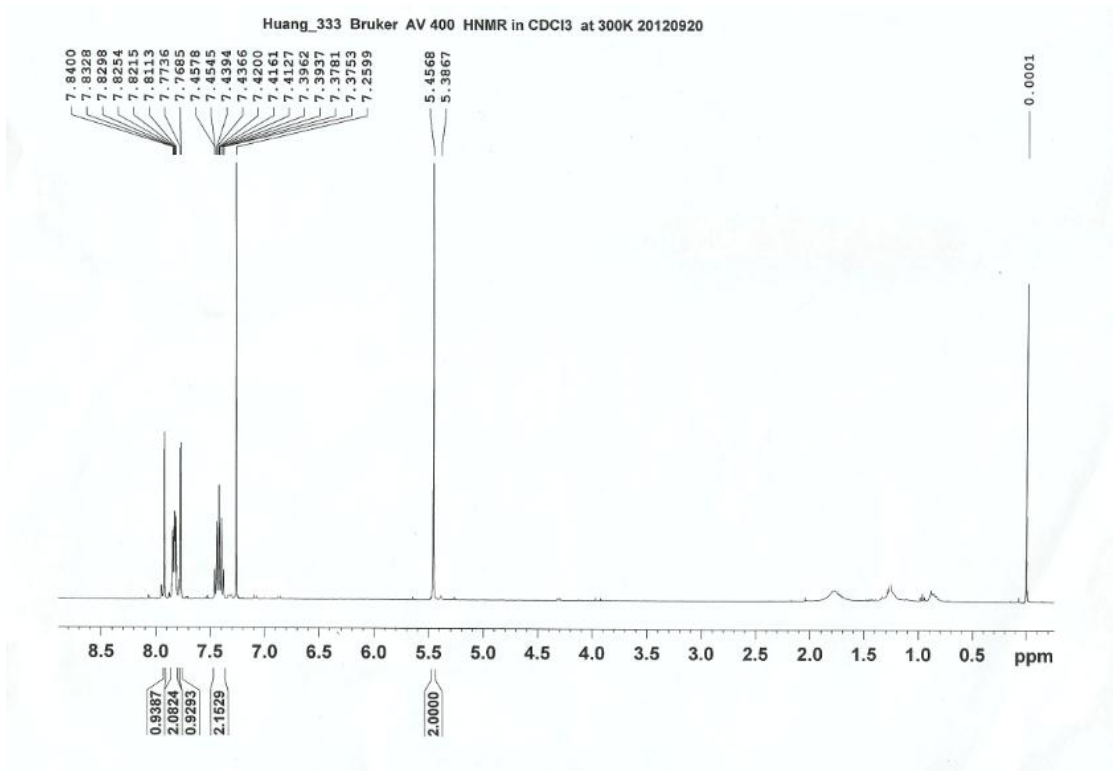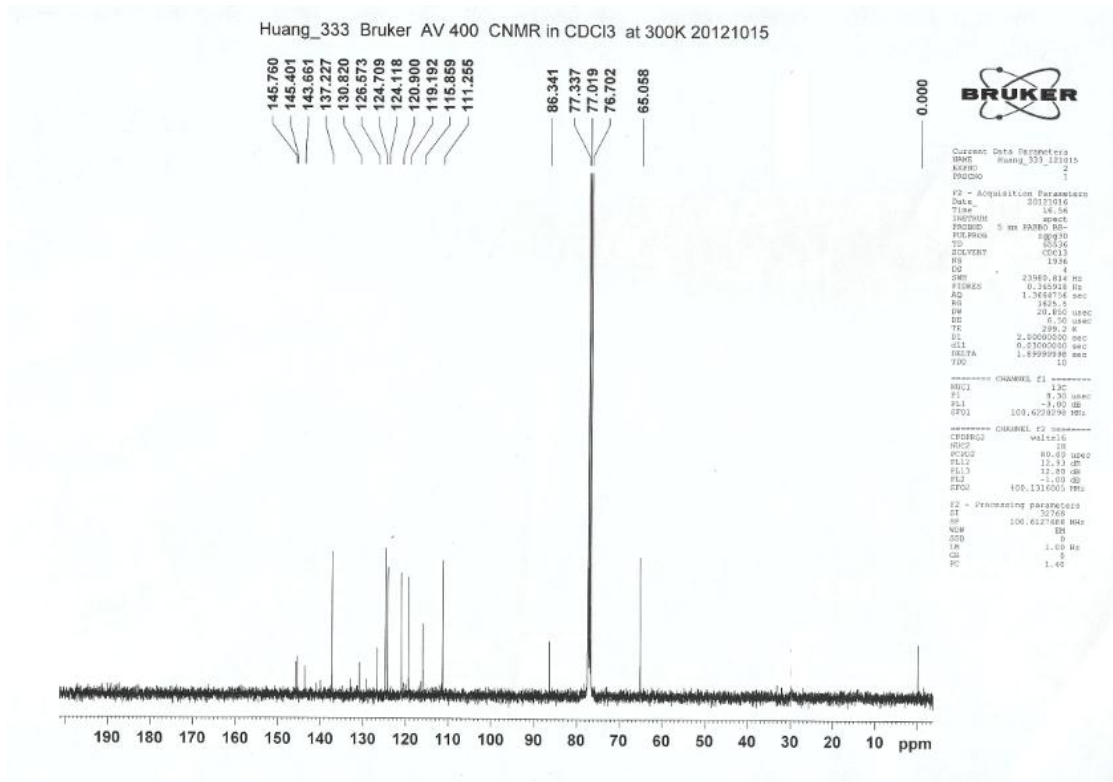

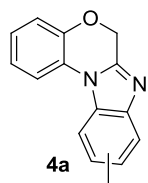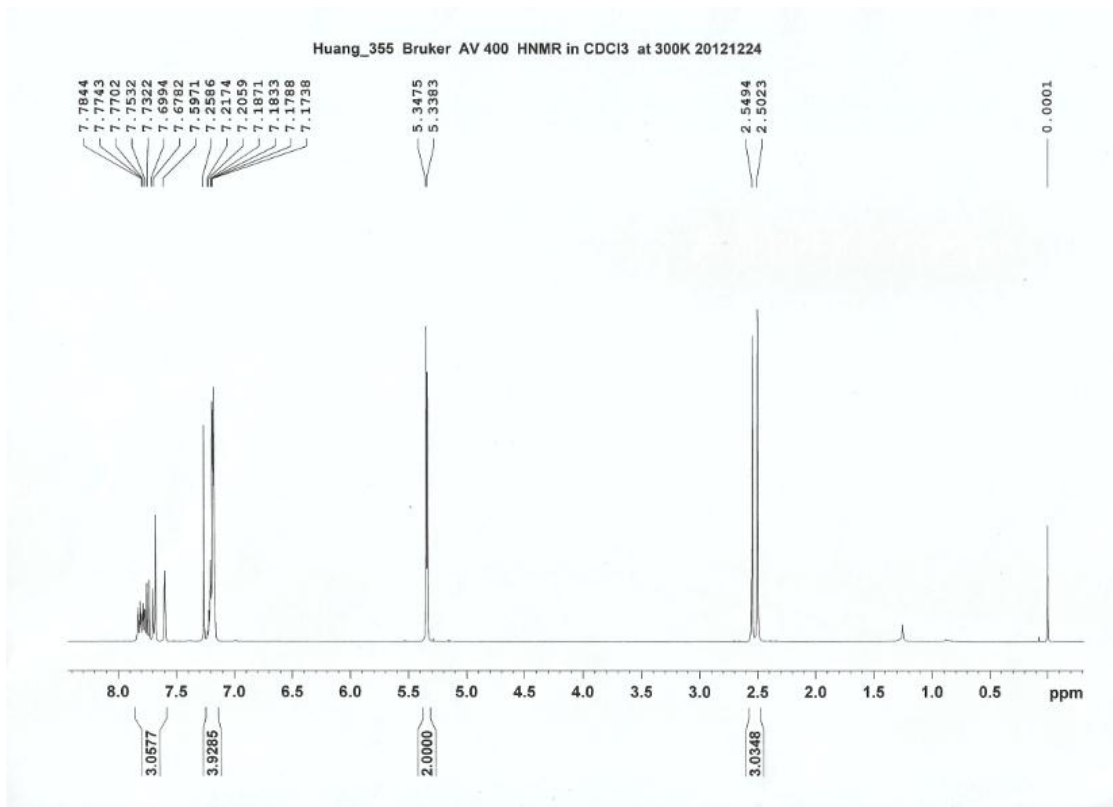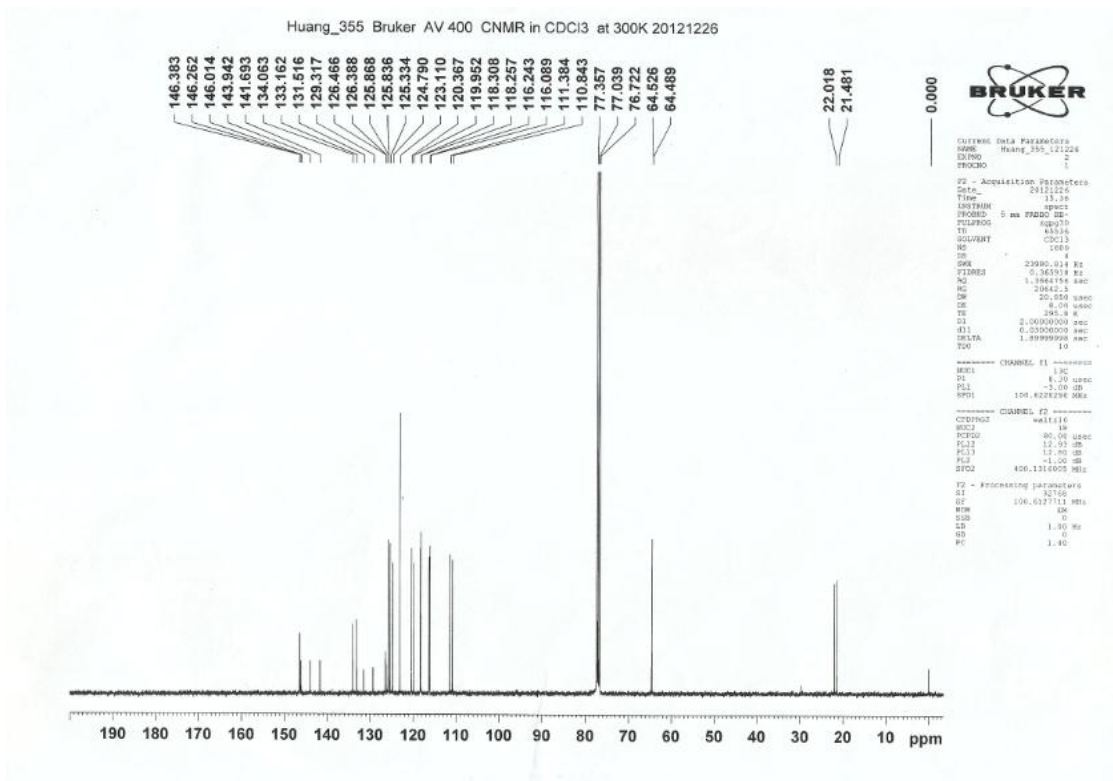



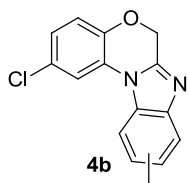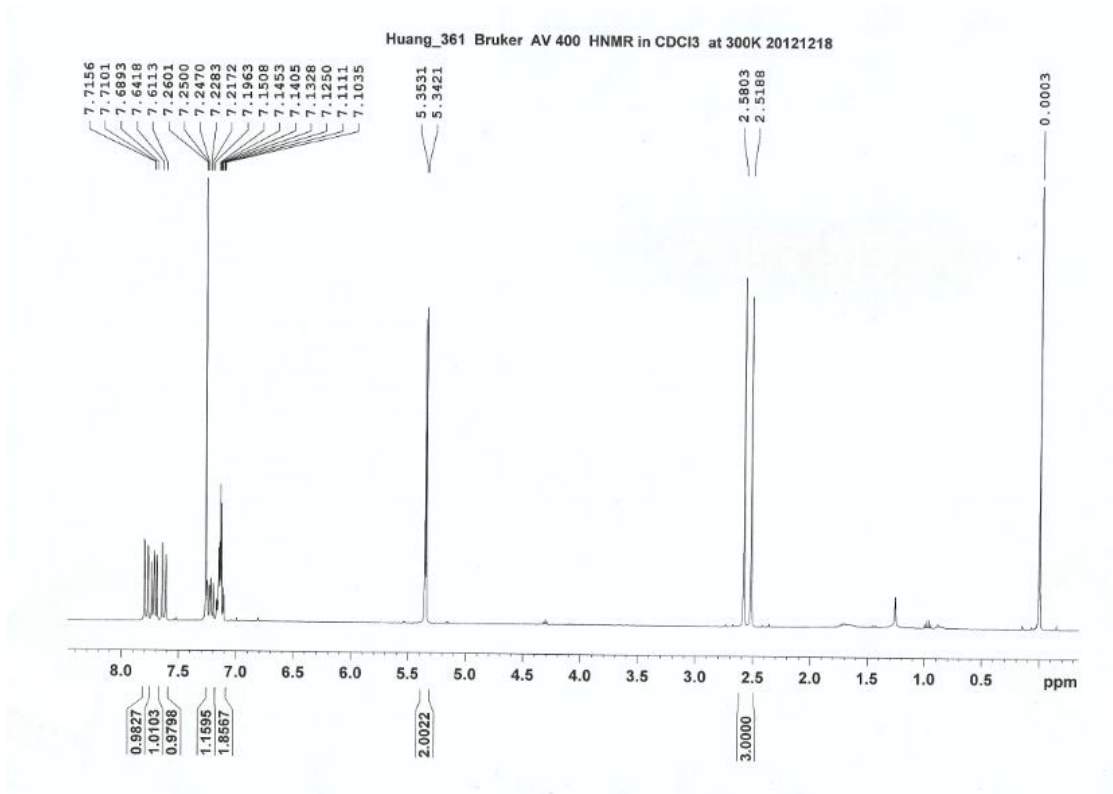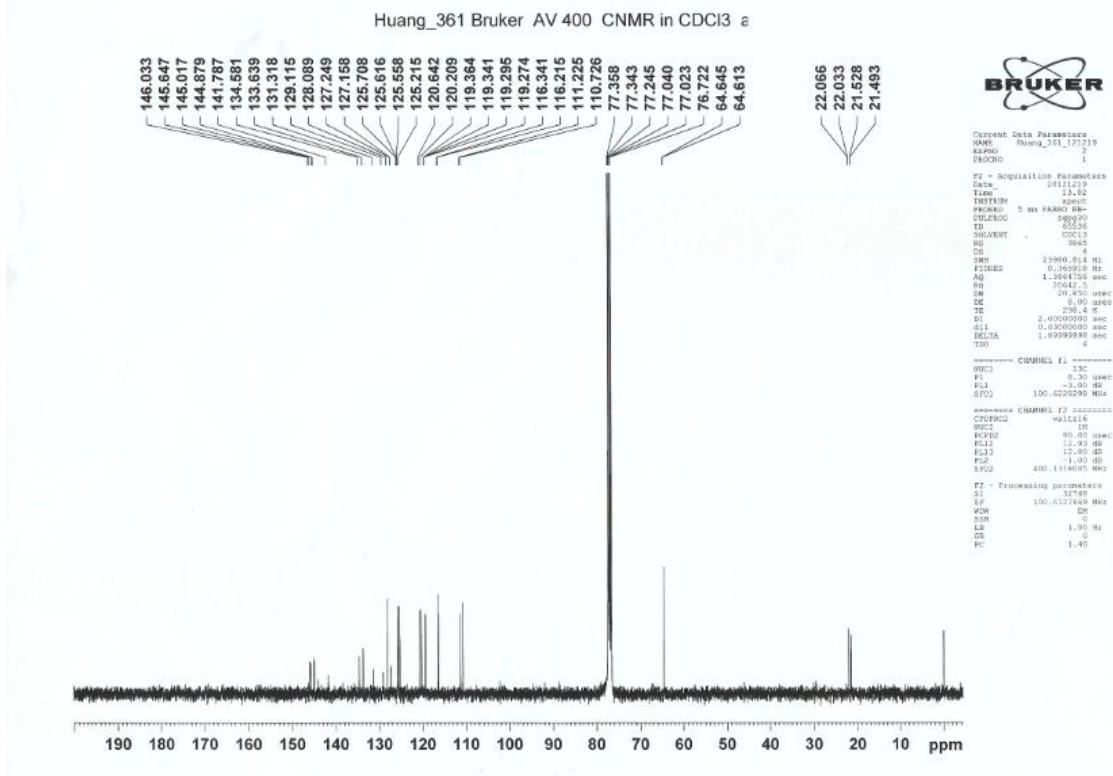

**BRUKER**

Current Data Parameters  
NAME Huang\_361\_121218  
EXPNO 2  
PROCNO 1

F2 - Acquisition Parameters  
Date\_ 20121218  
Time 12.12  
INSTRUM spect  
PROBHD 5 mm PABBO 500  
PULPROG zgpg30  
ID zgpg30  
SOLVENT CDCl3  
NS 360  
DS 4  
SWH 23060.814 Hz  
F2REQ 500.136185 MHz  
AQ 1.3664756 sec  
RG 356.625  
WM 20.850 usec  
DE 6.00 usec  
TE 298.2 K  
SI 2.00000000 sec  
SII 0.00000000 sec  
DELTA 1.69999999 sec  
TD0 1

===== CHANNEL f1 =====  
NUC1 13C  
P1 0.20 usec  
PL1 0.00 dB  
SFO1 100.6261200 MHz

===== CHANNEL f2 =====  
CPDPRG2 waltz16  
NUC2 1H  
PCPD2 05.00 usec  
PL2 19.00 dB  
PL3 12.00 dB  
PL4 19.00 dB  
SFO2 400.1514000 MHz

F2 - Processing parameters  
SI 32768  
SF 100.6127449 MHz  
WDW EM  
SSB 0  
LB 1.30 Hz  
GB 0  
PC 1.40

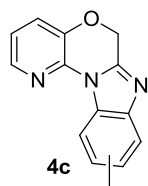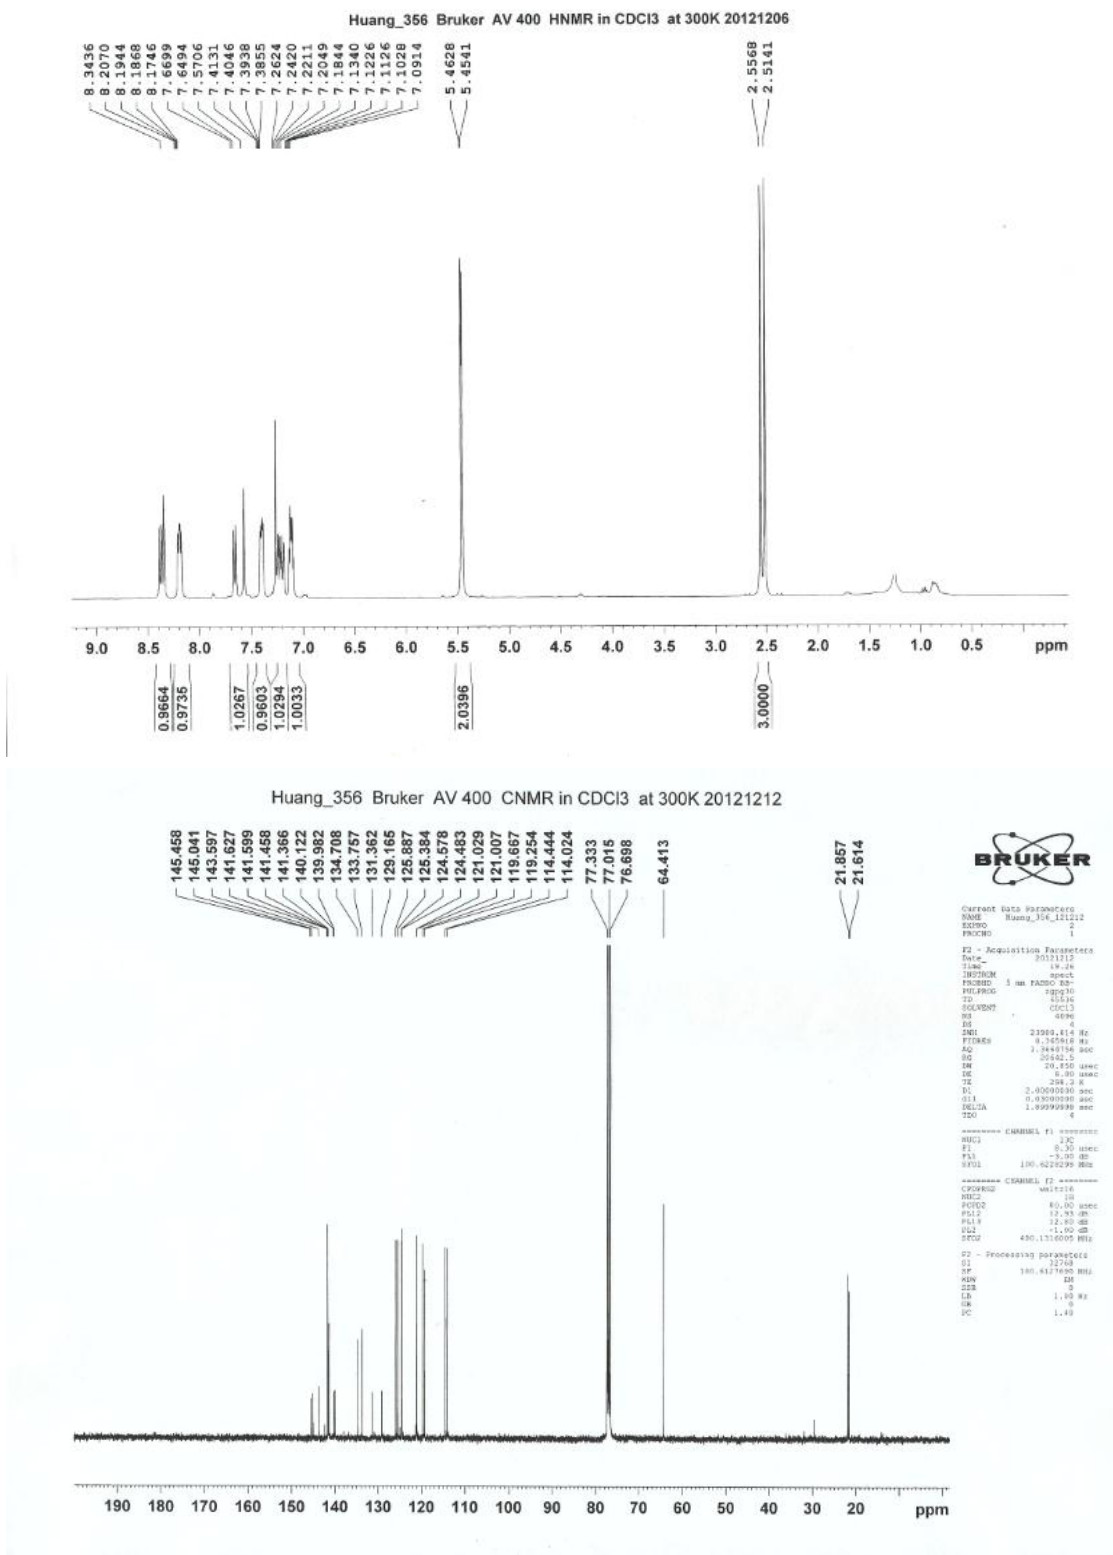



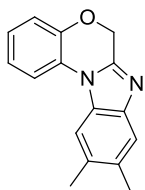

4d

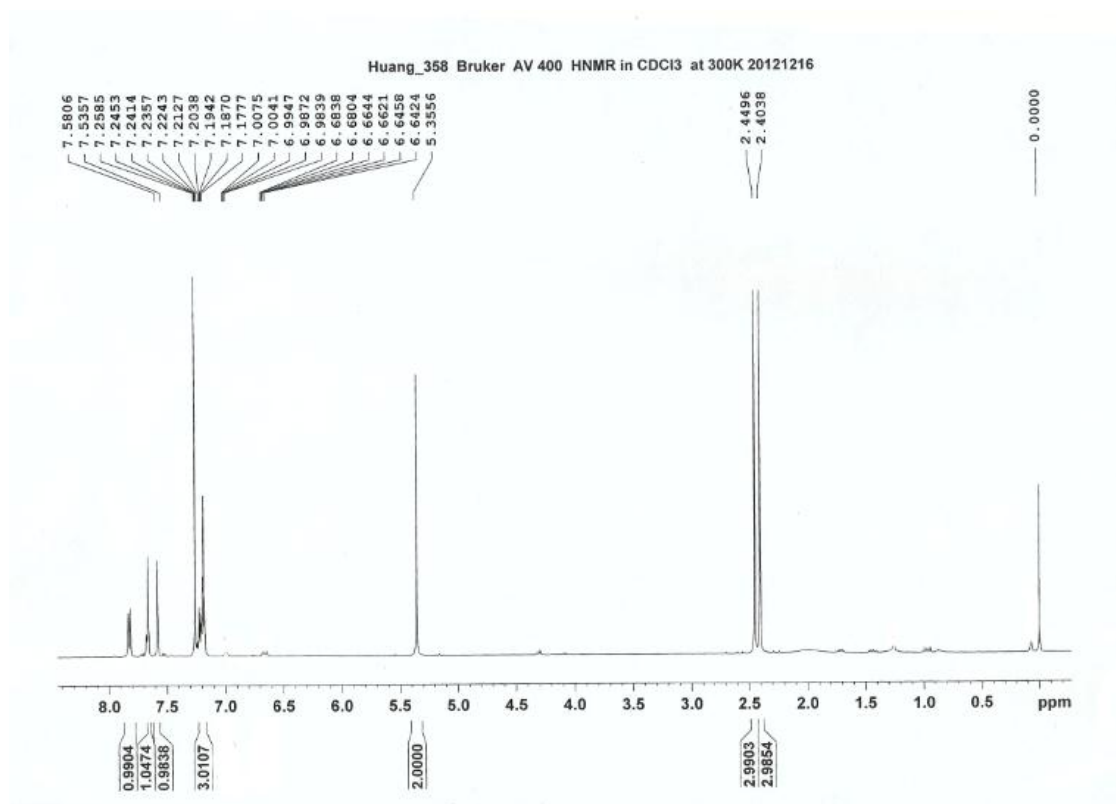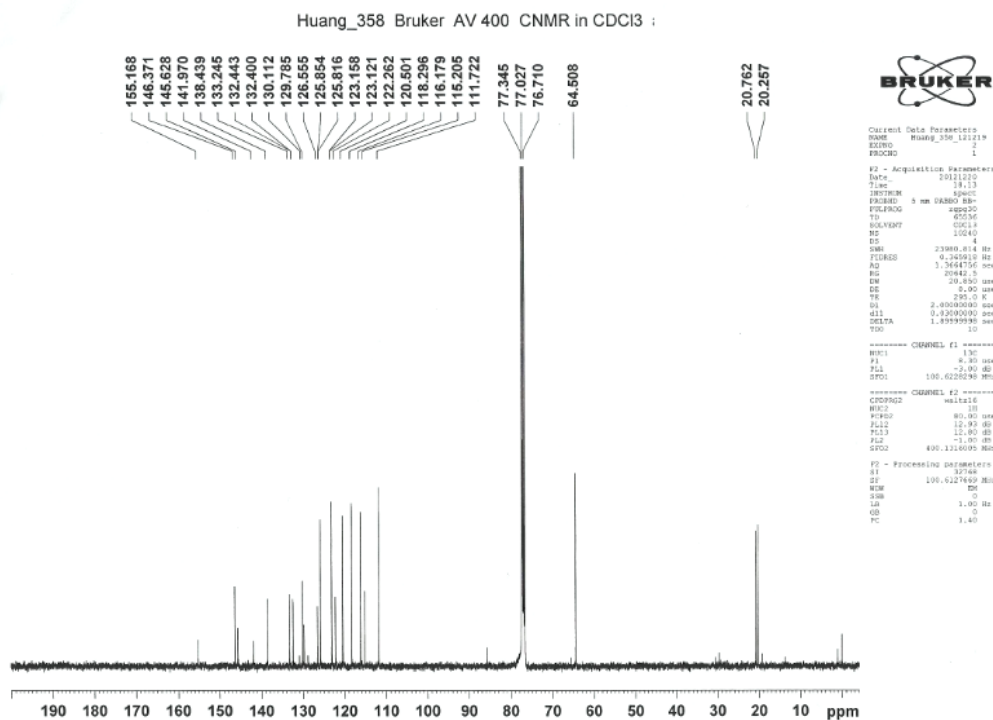

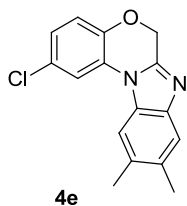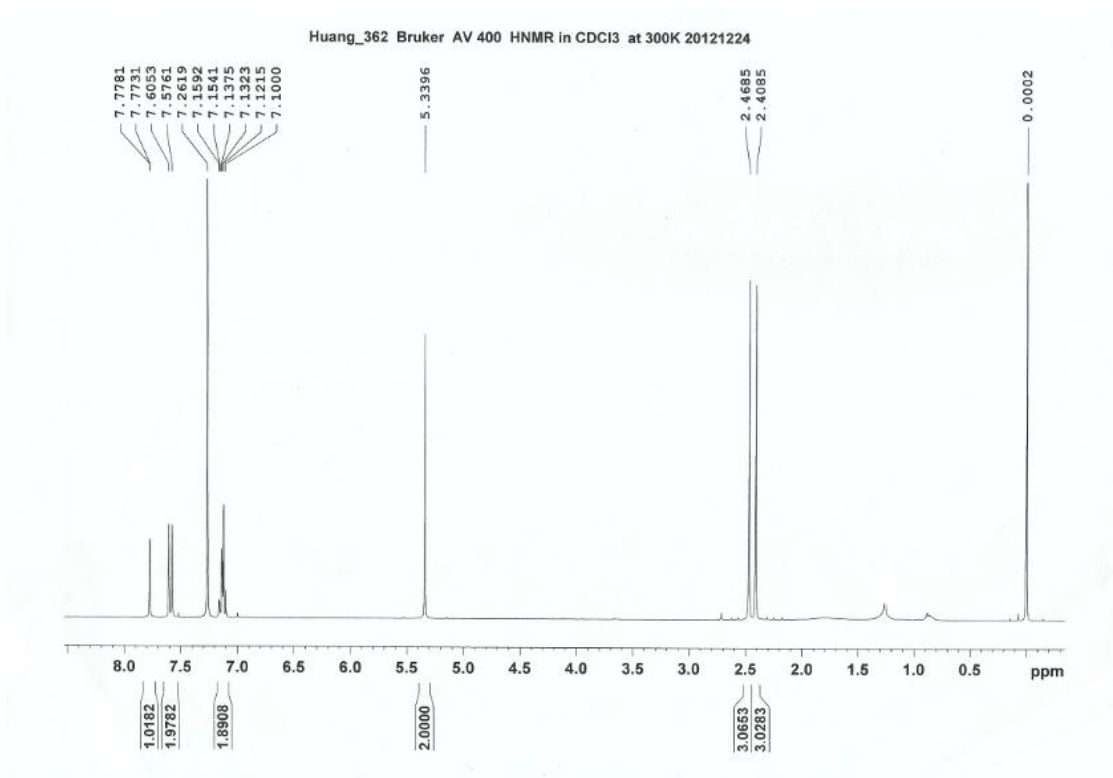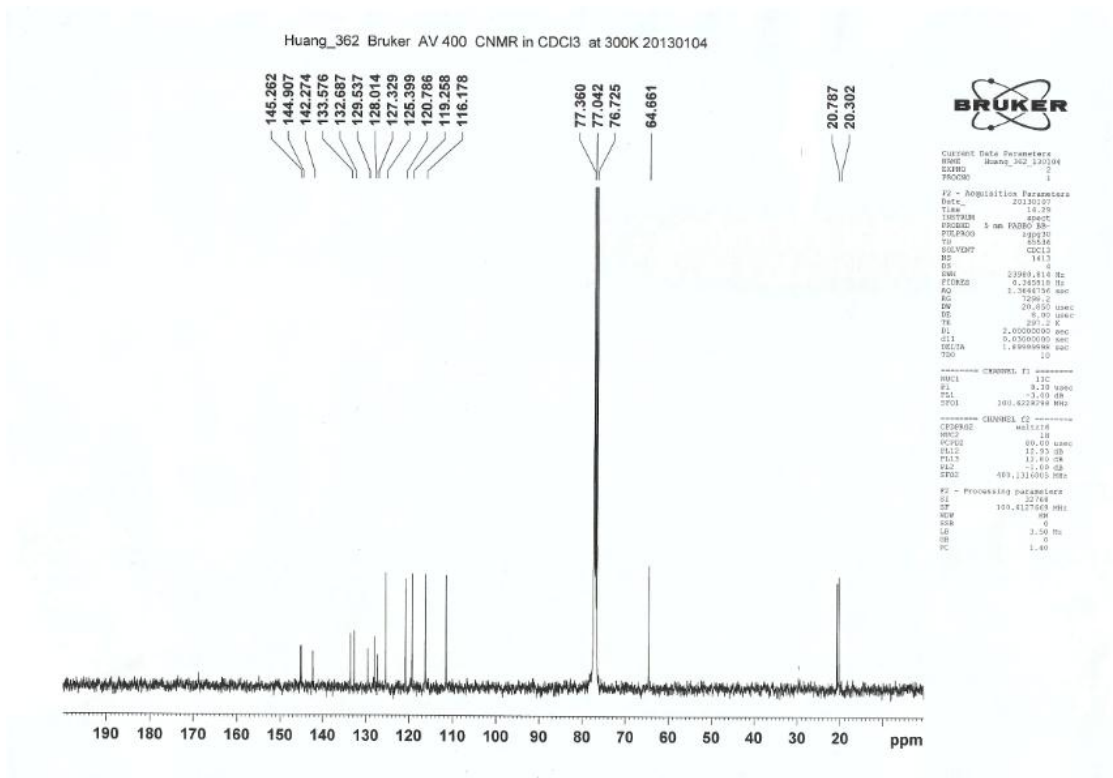

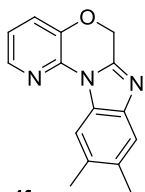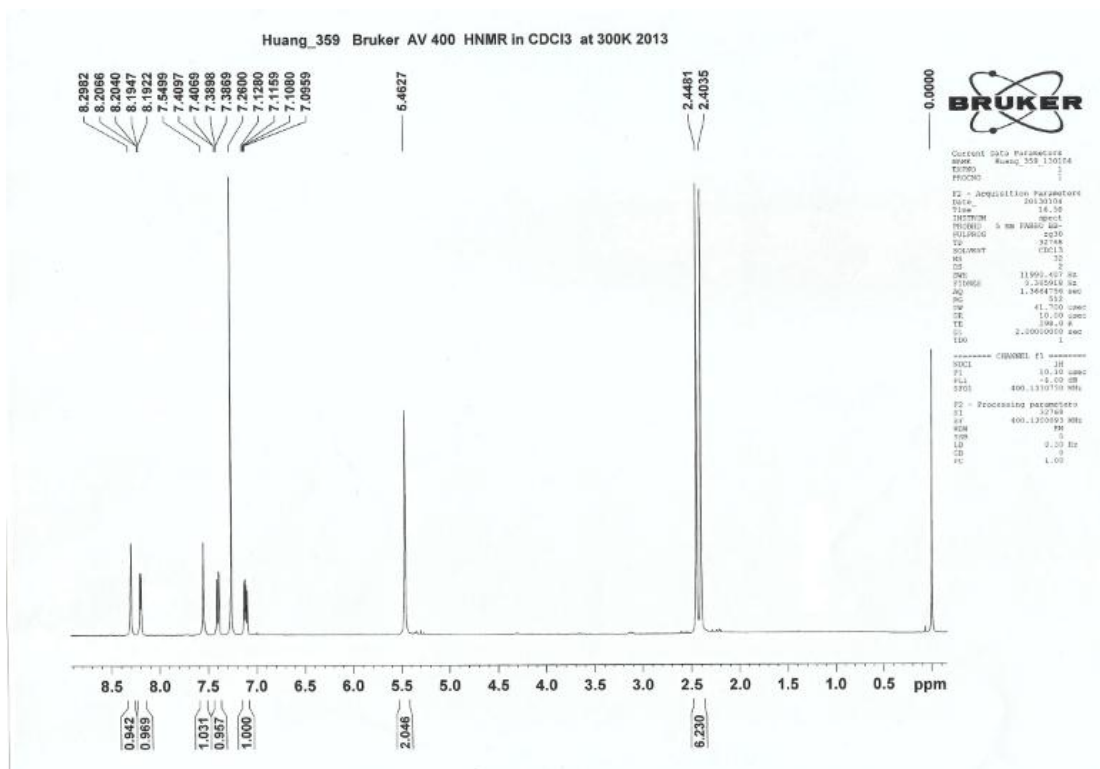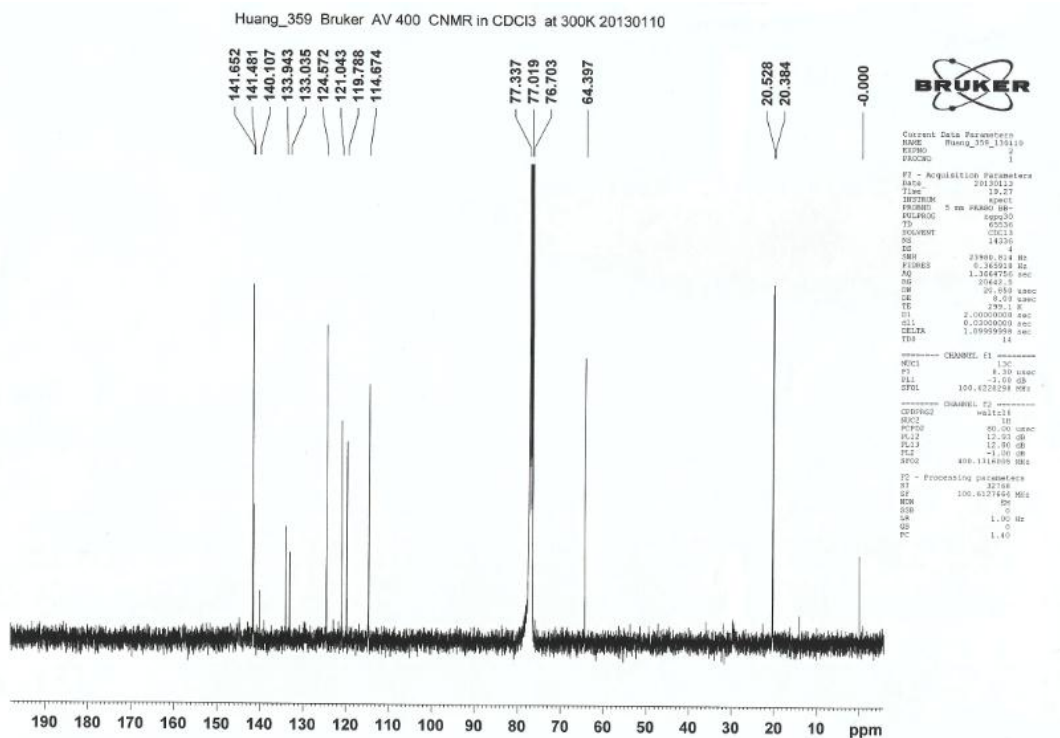

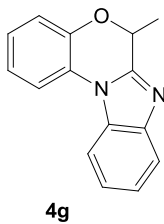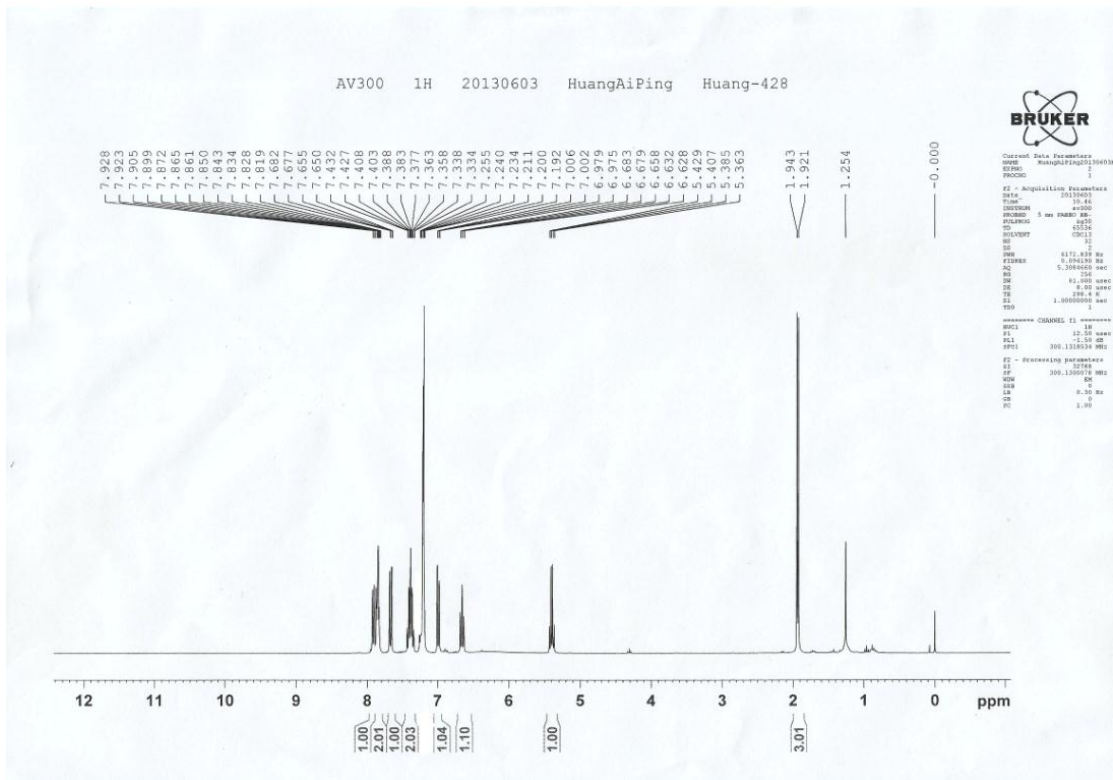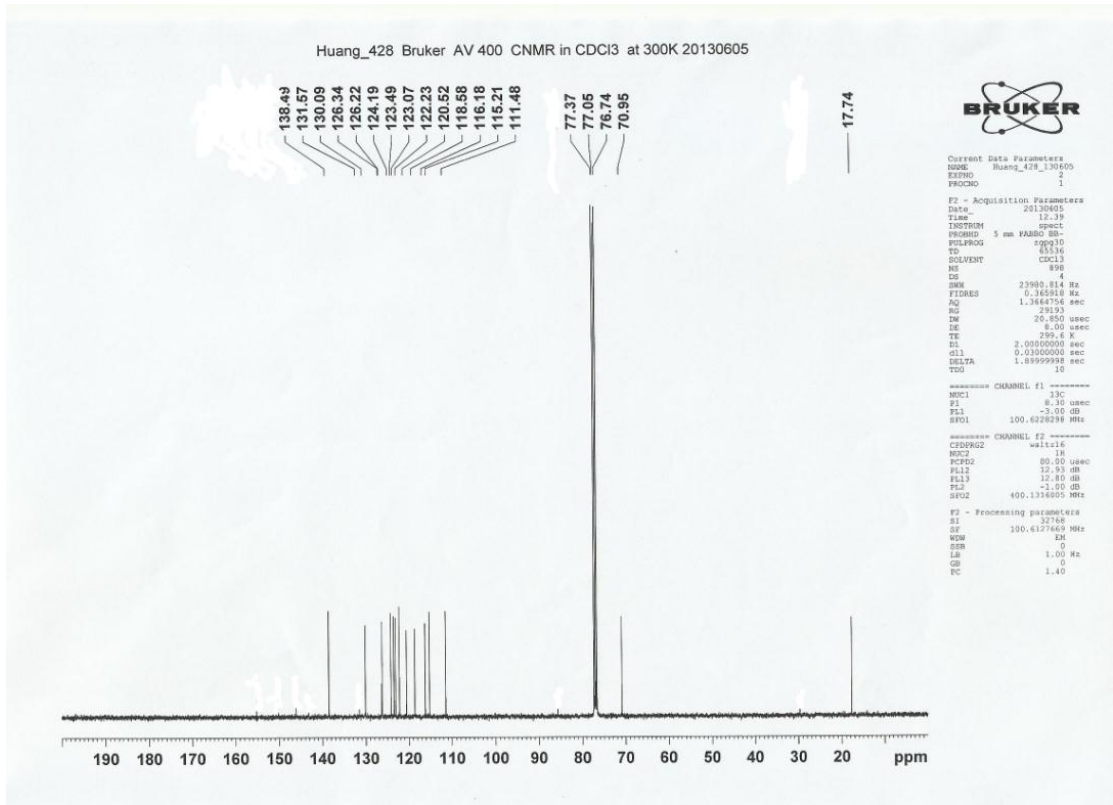

Supplement: c3ra42108b.pdf [file c3ra42108b.pdf]
